# Supplementary material for: Structural and biochemical mechanisms of NLRP1 inhibition by DPP9
Source: PubMed Central journal article supplement (PMC8081665; doi:10.1038/s41586-021-03320-w), 2021-03-17
Supplement: 41586_2021_3320_MOESM1_ESM.pdf [file 41586_2021_3320_MOESM1_ESM.pdf]

**Supplementary information**

---

**Structural and biochemical mechanisms of  
NLRP1 inhibition by DPP9**

---

In the format provided by the  
authors and unedited

## **Structural and biochemical mechanisms of NLRP1 inhibition by DPP9**

Menghang Huang<sup>1, #</sup>, Xiaoxiao Zhang<sup>1, #</sup>, Toh Gee Ann<sup>2</sup>, Qin Gong<sup>4</sup>, Jia Wang<sup>1</sup>, Zhifu Han<sup>1</sup>, Bin Wu<sup>4,5</sup>, Franklin Zhong<sup>2,3,\*</sup> and Jijie Chai<sup>1,6,7,\*</sup>

<sup>1</sup>Beijing Advanced Innovation Center for Structural Biology, Tsinghua- Peking Joint Center for Life Sciences, Center for Plant Biology, School of Life Sciences, Tsinghua University, 100084 Beijing, China

<sup>2</sup>Lee Kong Chian School of Medicine, Nanyang Technological University, 11 Mandalay Road, 308232, Singapore

<sup>3</sup>Skin Research Institute of Singapore (SRIS), 8A Biomedical Grove, #06-06 Immunos, 138648, Singapore

<sup>4</sup>School of Biological Sciences, Nanyang Technological University

<sup>5</sup>Institute of Structural Biology, Nanyang Technological University

<sup>6</sup>Max Planck Institute for Plant Breeding Research, 50829 Cologne, Germany

<sup>7</sup>Institute of Biochemistry, University of Cologne, Zulpicher Strasse 47, 50674 Cologne, Germany

<sup>#</sup>Equal contributions

\*To whom correspondence should be addressed: [chaijj@mail.tsinghua.edu.cn](mailto:chaijj@mail.tsinghua.edu.cn) or [Franklin.zhong@ntu.edu.sg](mailto:Franklin.zhong@ntu.edu.sg)

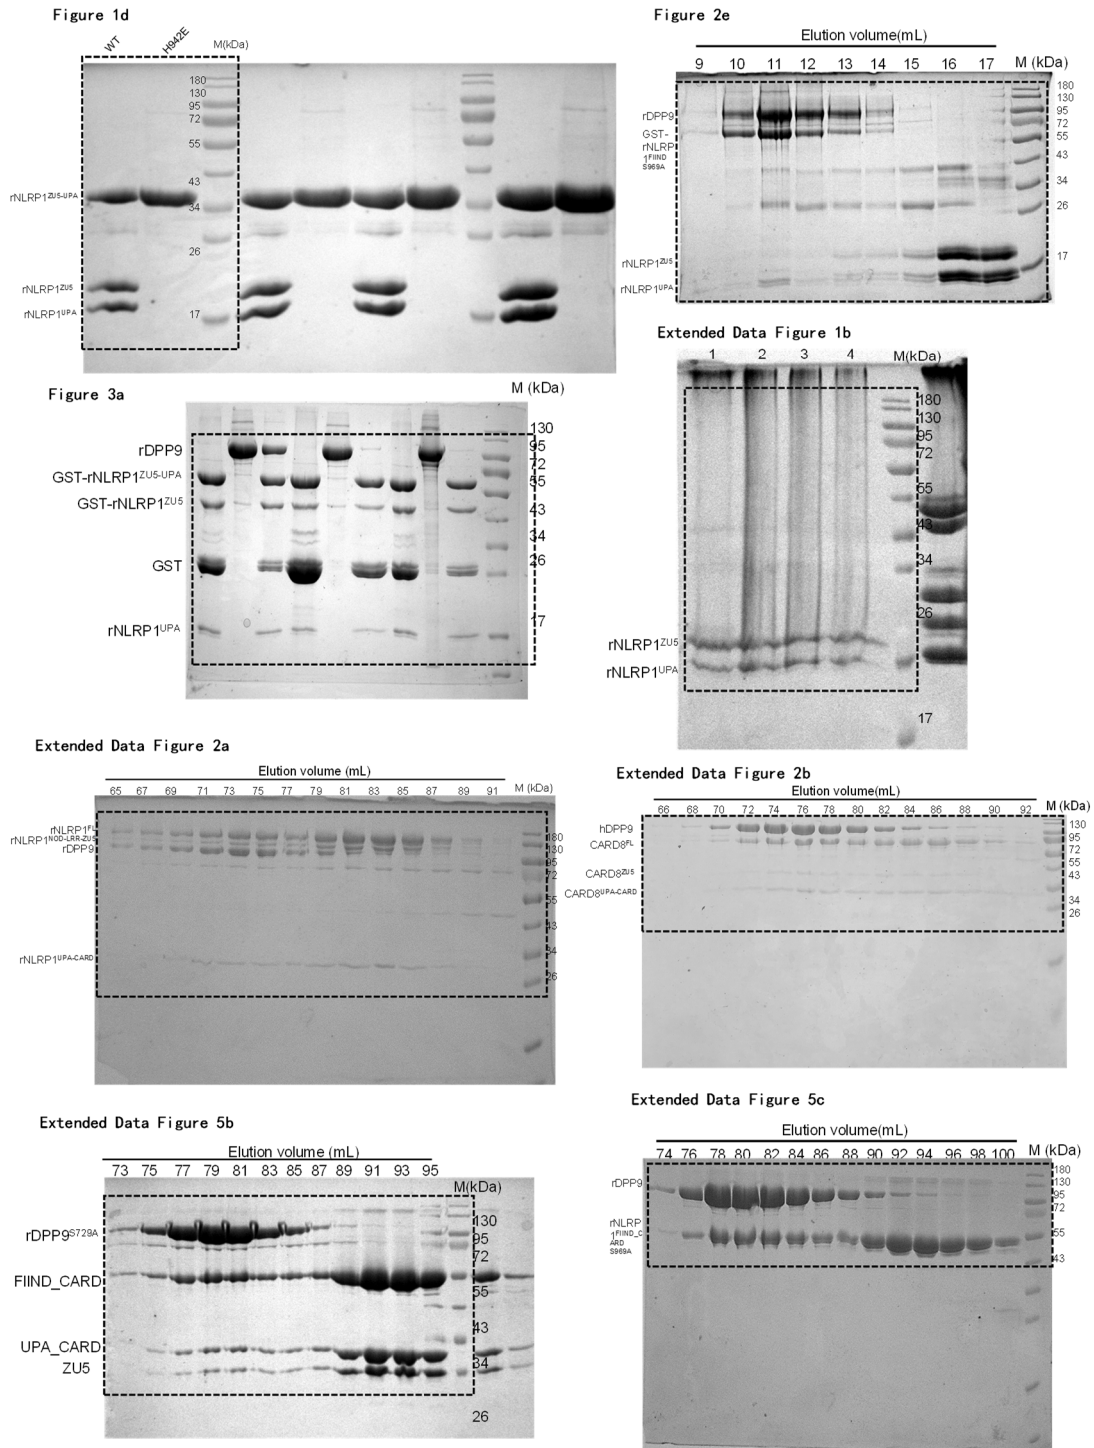

**Supplementary Figure 1 | Full scans of comassie stained gels presented in Figure. 1d, 2e, 3a and Extended Data Figure 1b, 2a, 2b, 5b, 5c.**

The frames surround areas that were cropped to assemble the main figures. The molecular weight of the ladder of each gel was marked.

Extended Data Figure 7a

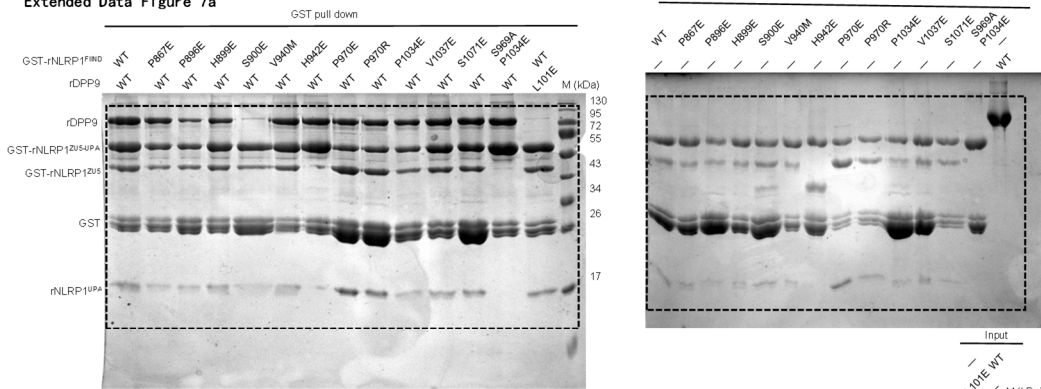

Extended Data Figure 7b

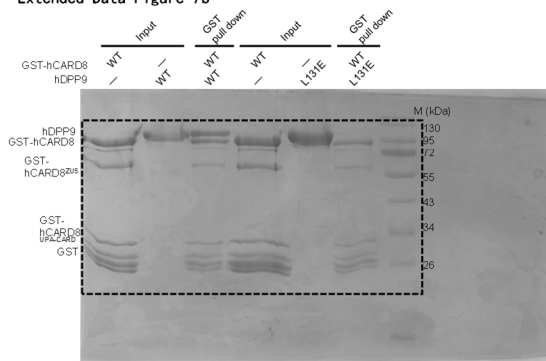

Extended Data Figure 7f

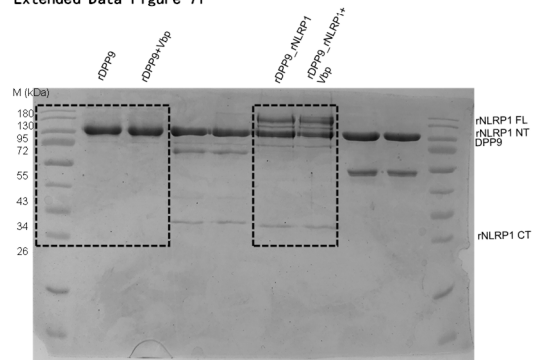

Extended Data Figure 8e

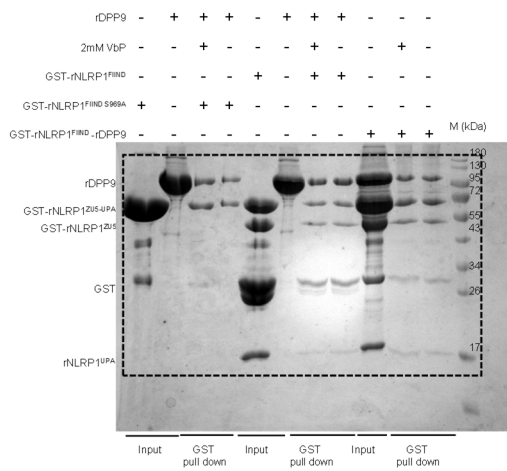

Extended Data Figure 8g

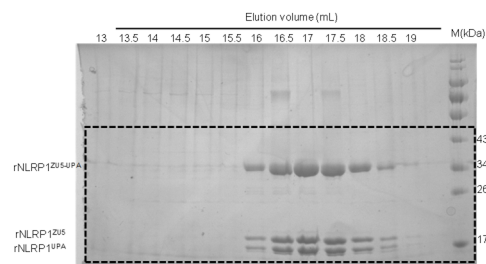

## Supplementary Figure 2 | Full scans of commissie stained gels presented in Extended Data Fig. 7a, 7b, 7f, 8e and 8g.

The frames surround areas that were cropped to assemble the main figures. The molecular weight of the ladder of each gel was marked.

Figure 3b

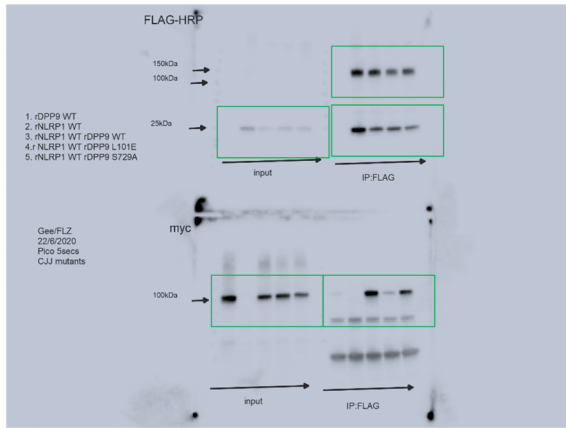

Figure 3e

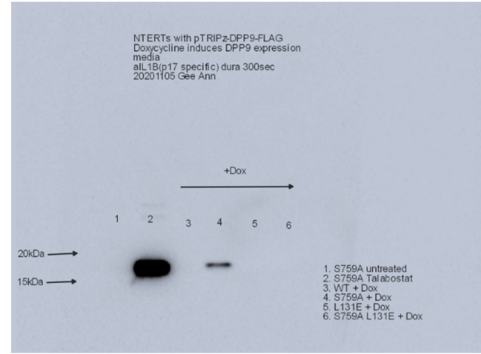

Figure 3c

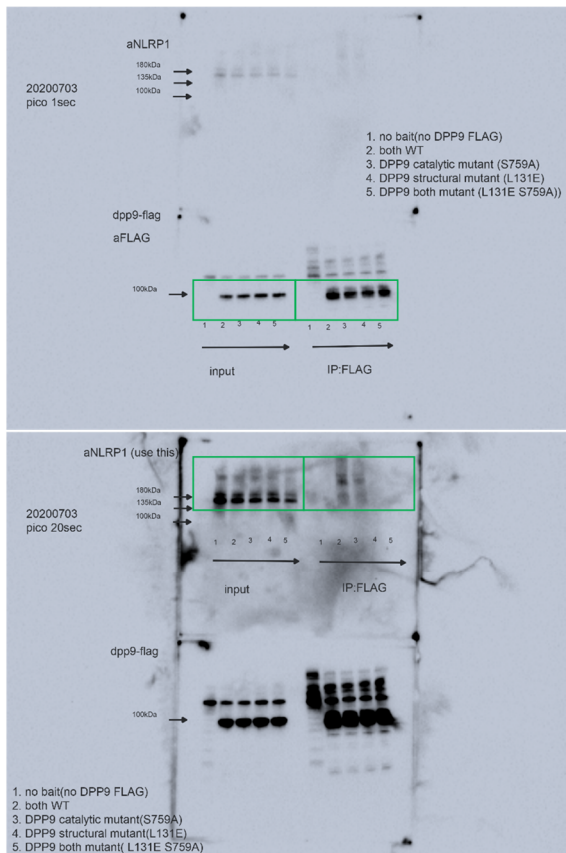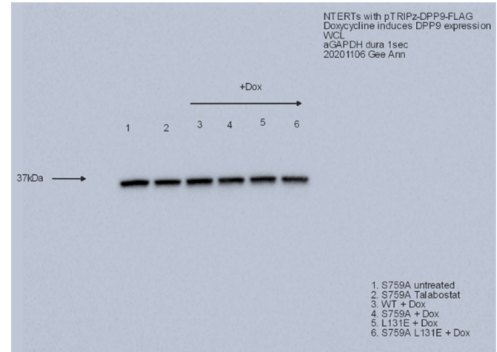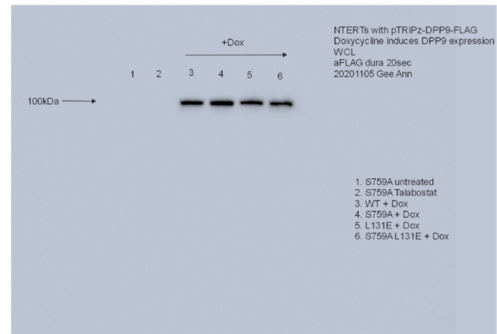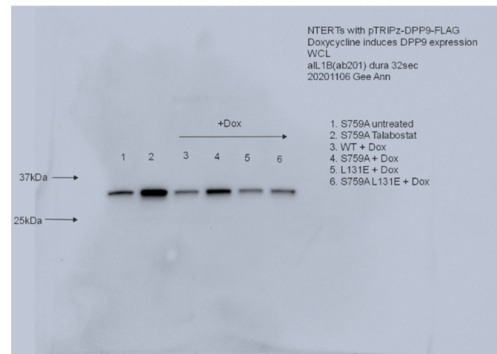

### Supplementary Figure 3 | Full scans of western blots presented in Fig. 3b, 3c and 3e.

The frames surround areas that were cropped to assemble the main figures. The molecular weight of the ladder of each gel was marked.

Extended Data Figure 7c

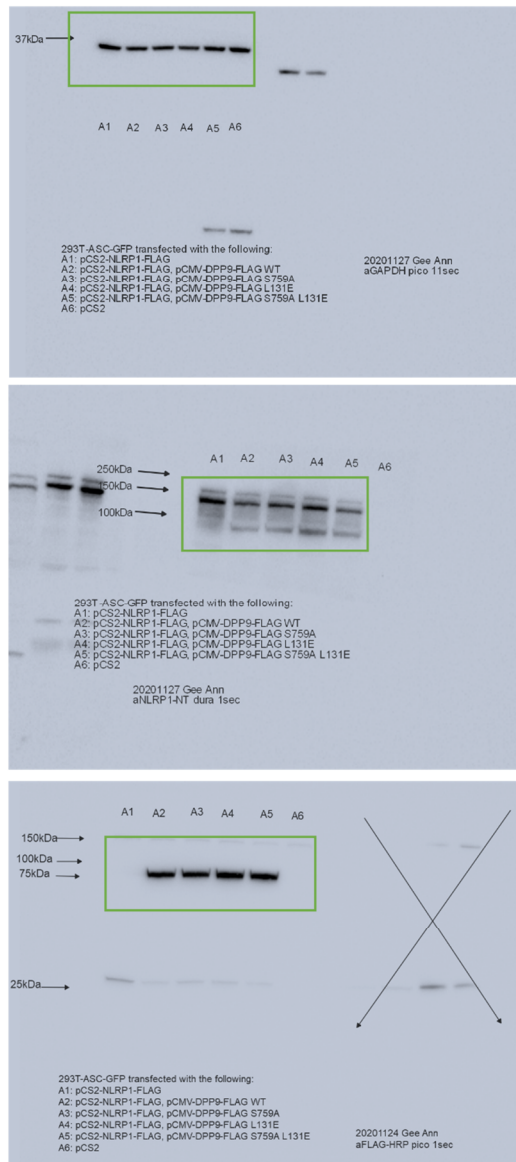

Extended Data Figure 7e

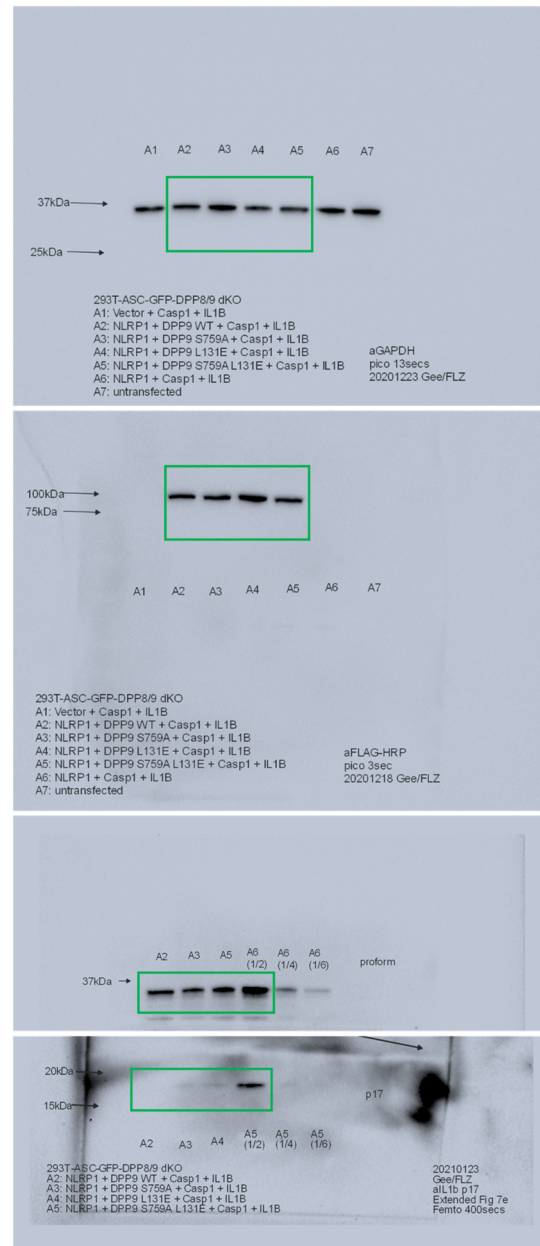

Supplementary Figure 4 | Full scans of western blots presented in Extended Data Fig. 7c and 7e.

The frames surround areas that were cropped to assemble the main figures. The molecular weight of the ladder of each gel was marked.

Extended Data Figure 8b

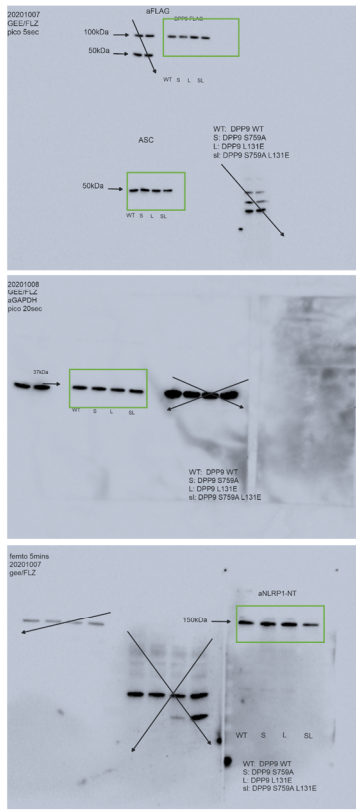

Extended Data Figure 8d

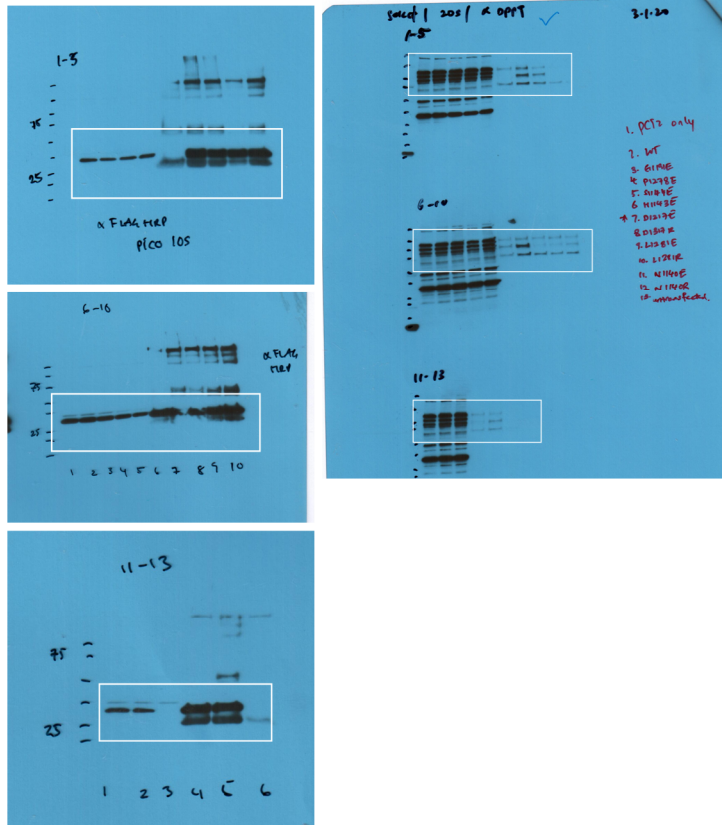

Extended Data Figure 8f

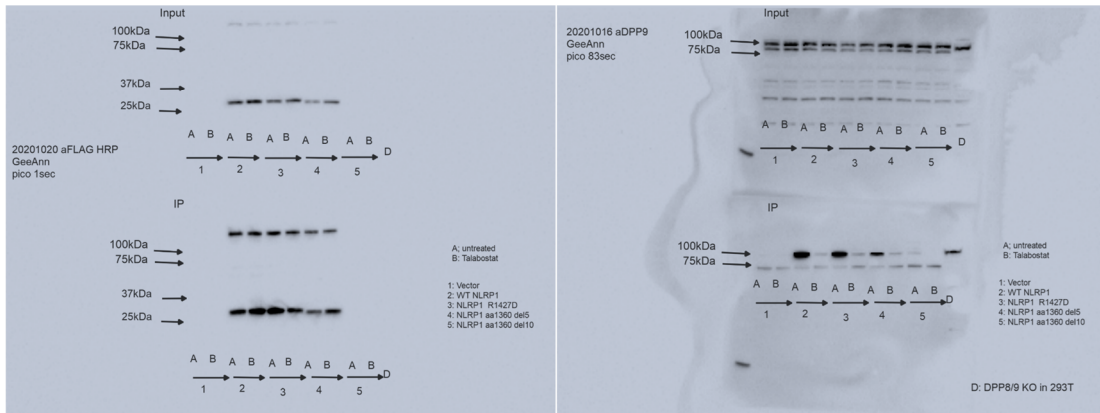

Supplementary Figure 5 | Full scans of western blots presented in Extended Data Fig. 8b, 8d and 8f.

The frames surround areas that were cropped to assemble the main figures. The molecular weight of the ladder of each gel was marked.
